# Supplementary material for: Roles of LINC01473 and CD74 in osteoblasts in multiple myeloma bone disease
Source: PubMed Central journal article supplement — J Investig Med. 2022 Feb 10;70(5):1301–7. doi: 10.1136/jim-2021-002192 (PMC9240337; doi:10.1136/jim-2021-002192), 2022-02-10
Supplement: jim-2021-002192supp001.pdf [file jim-2021-002192supp001.pdf]

**Supplementary material****Table S1. Primer sequences**

| Target    | Sense and antisense sequences                                          | Tm     |
|-----------|------------------------------------------------------------------------|--------|
| CD74      | F: 5'-AGCGCGACCTTATCTCCAACAATG-3'<br>R: 5'-AGCGAGGAGCAGAGTCACCAG-3'    | 61.5°C |
| HIST1H1D  | F: 5'-CTGCTCCACTTGCTCCTACCATTG-3'<br>R: 5'-CCTTAGAAGCTGCCACTGCCTTG-3'  | 63.6°C |
| IBSP      | F: 5'-GCAGCAGCGGAGGAGACAATG-3'<br>R: 5'-ACCCACCATTGGAGAGGTTGTTG-3'     | 60°C   |
| CMPK2     | F: 5'-GACCTTATCCTGCTGCTCACTGTG-3'<br>R: 5'-TCTGCTTCTCCCTGGTCTTCTCC-3'  | 63.6°C |
| LINC01473 | F: 5'-TCCGCCCTGCTTAGCAAATTTCT-3'<br>R: 5'-GCTTTGCTTGTACTTCTTCCTGCT-3'  | 55°C   |
| SMUG1     | F: 5'-GCTGAAGCTATCCTCTTGCCTTGG-3'<br>R: 5'-CAGTTGCCTGGTCAAACCTGTCTC-3' | 62.5°C |
| CSNK1D    | F: 5'-AACATCTCCTCGTCCGACCTCAC-3'<br>R: 5'-GAATCCAGTGCTGCCTTCCGATG-3'   | 63.6°C |
| GAPDH     | F: 5'-GCACCGTCAAGGCTGAGAAC-3'<br>R: 5'-TGGTGAAGACGCCAGTGGA-3'          |        |

Tm, Temperature

**Table S2. The differentially expressed lncRNAs in MM**

| LncRNA      | log2 (Fold Change) | P-adj    | Regulation |
|-------------|--------------------|----------|------------|
| CNTNAP2     | 19.17068           | 0.000996 | up         |
| ZCCHC7      | 16.69069           | 0.04903  | up         |
| DDX56       | 15.61792           | 0.013154 | up         |
| DOCK8       | 15.11436           | 0.020109 | up         |
| CMPK2       | 14.7758            | 0.038218 | up         |
| LINC01473   | 14.43043           | 0.029256 | up         |
| XLOC_111015 | 14.33685           | 0.034917 | up         |
| SZT2        | 14.18549           | 0.034285 | up         |
| TENM4       | 14.14374           | 0.032949 | up         |
| NFU1        | 12.34335           | 0.022821 | up         |
| NUTM2A-AS1  | 12.1823            | 0.025167 | up         |
| XLOC_057197 | 12.01475           | 0.012824 | up         |
| MALRD1      | 11.62401           | 0.038658 | up         |
| ZNRF1       | 11.29796           | 0.049149 | up         |
| CCDC26      | 11.26326           | 0.041617 | up         |
| ABHD3       | 11.1229            | 0.046915 | up         |
| SMUG1       | 11.09421           | 0.046915 | up         |
| FAM66D      | 10.1229            | 0.024206 | up         |
| MKLN1       | 9.690808           | 0.037829 | up         |
| CSNK1D      | 9.527512           | 0.034729 | up         |
| FAM66D      | 9.147664           | 0.038658 | up         |

|             |          |          |      |
|-------------|----------|----------|------|
| ATL2        | 9.109714 | 0.035507 | up   |
| SPATA6L     | -9.30656 | 0.042337 | down |
| BACH1       | -9.3666  | 0.033635 | down |
| AC010198.2  | -9.54748 | 0.029845 | down |
| MUC20-OT1   | -10.944  | 0.009811 | down |
| PRKN        | -11.113  | 0.046915 | down |
| NAE1        | -11.1239 | 0.049869 | down |
| TTC28-AS1   | -11.8264 | 0.010398 | down |
| PLS3-AS1    | -12.2141 | 0.026701 | down |
| ASS1        | -12.6292 | 0.020454 | down |
| CAPZA1      | -12.8826 | 0.012933 | down |
| XLOC_089118 | -12.9966 | 0.0358   | down |
| DMGDH       | -13.2408 | 0.017038 | down |
| MAGED2      | -13.3104 | 0.010398 | down |
| SGCE        | -13.4987 | 0.010841 | down |
| DLEU2       | -13.514  | 0.048178 | down |
| AL357146.1  | -13.5653 | 0.046551 | down |
| TASPI       | -13.8763 | 0.005243 | down |
| CASTOR3     | -14.4022 | 5.59E-05 | down |
| VLDLR-AS1   | -14.4784 | 0.033635 | down |
| PPARG       | -14.5649 | 0.044962 | down |
| ZMYM1       | -16.8746 | 0.047376 | down |

**Table S3. The differentially expressed mRNAs in MM**

| mRNA       | log2 (Fold Change) | P- adj   | Regulation |
|------------|--------------------|----------|------------|
| KCNH8      | 11.60133           | 0.003377 | up         |
| AL159163.1 | 13.15398           | 0.003377 | up         |
| CXCL13     | 12.14868           | 0.013742 | up         |
| KCNJ3      | 15.04035           | 0.018635 | up         |
| HBB        | 8.931335           | 0.026179 | up         |
| EPYC       | 9.201184           | 0.026179 | up         |
| PCDH11Y    | 11.66464           | 0.026564 | up         |
| GREB1      | 4.062673           | 0.026564 | up         |
| AP002748.4 | 6.56049            | 0.026564 | up         |
| C4orf50    | 11.39567           | 0.026564 | up         |
| S100Z      | 10.96474           | 0.032388 | up         |
| UNC80      | 7.961308           | 0.034357 | up         |
| CD74       | 2.367186           | 0.03451  | up         |
| HIST1H1D   | 2.591138           | 0.04592  | up         |
| IBSP       | 3.583879           | 0.047418 | up         |
| ADGRE3     | 9.093116           | 0.048418 | up         |
| NEXMIF     | 4.084202           | 0.049819 | up         |
| HTR2C      | 12.80656           | 0.049819 | up         |
